# Supplementary material
Source: PubMed Central journal article supplement (PMC5427263)
Supplement: 10.1074_M117.783878_jbc.M117.783878-1.pdf [file 10.1074_M117.783878_jbc.M117.783878-1.pdf]

**Regulation of pH in early endosomes and interferon-inducible transmembrane proteins modulate avian retrovirus fusion**

Tanay M. Desai, Mariana Marin, Caleb Mason and Gregory B. Melikyan

**Supplemental Data**

**List of attached files:**

Supplemental Figure 1 and legend

Supplemental Figure 2 and legend

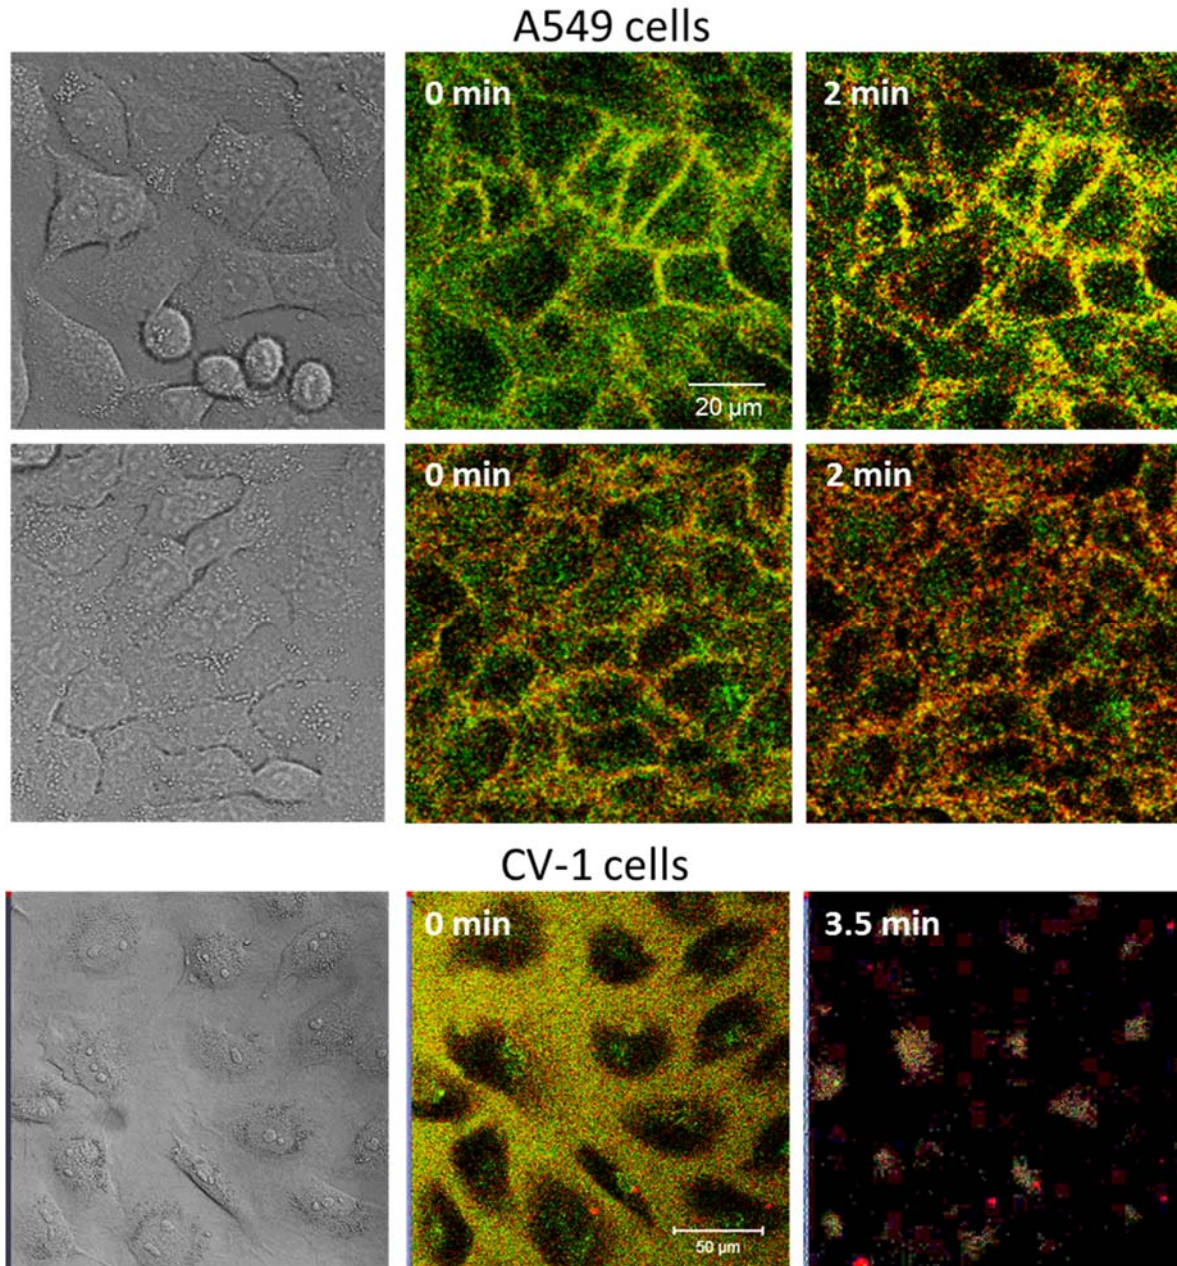

**Supplementary Figure S1. Visualization of endosomal acidification in A549 and CV-1 cells using a mixture of two fluorescent transferrins.** *Top and middle panels:* A549/TVA950 cells bathed in DMEM or LIB, as indicated, were allowed to internalize a mixture of FITC-transferrin (green) and AF594 transferrin (red) at 37°C, and time-lapse confocal images were taken. Shown are the 0 min (before uptake) and 2 min time points. DIC images are shown on the left. *Lower panel:* transferrin uptake by CV-1/TVA950 cells bathed in LIB. Conditions experimental were identical to those employed in top and middle panels.

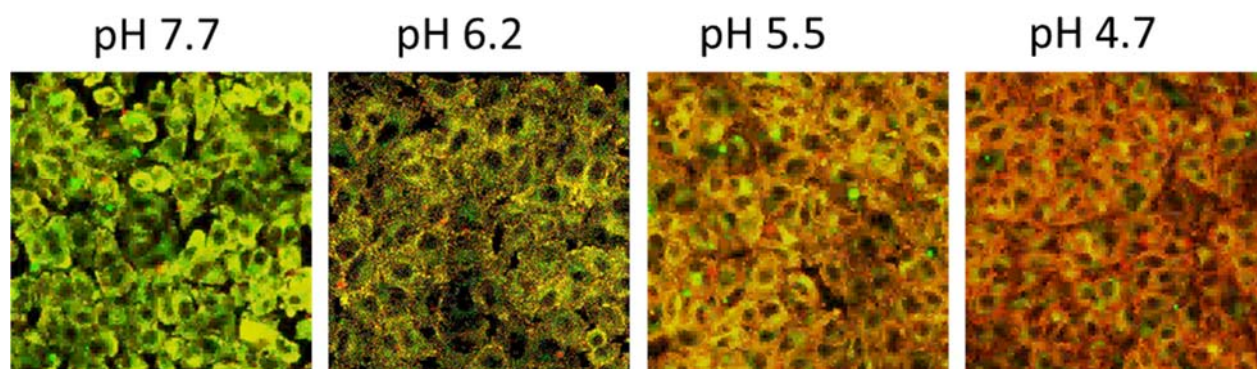

**Supplementary Figure S2. Calibration of endosomal pH using a mixture of fluorescent transferrins.** A549/TVA950 cells were allowed to internalize a mixture of FITC-transferrin (green) and AF594 transferrin (red) for 15 min at 37°C, as described in Experimental Procedures. Cells were then exposed to solutions buffered at indicated pH and supplemented with monensin/nigericin in order to equilibrate extracellular and endosomal pH.
